# Supplementary material for: Rapid increase in dichloromethane emissions from China inferred through atmospheric observations
Source: PubMed Central journal article supplement (PMC8671471; doi:10.1038/s41467-021-27592-y), 2021-12-14
Supplement: 41467_2021_27592_MOESM1_ESM.pdf [file 41467_2021_27592_MOESM1_ESM.pdf]

Supplementary information to: Rapid increase in dichloromethane  
emissions from China inferred through atmospheric observations

Minde An et al.

| Station      | Abbreviation | Longitude<br>(°E) | Latitude<br>(°N) | Altitude<br>(masl) | Inlet height<br>(magl) | Measurement periods                                           | Sampling frequency          | Location               |
|--------------|--------------|-------------------|------------------|--------------------|------------------------|---------------------------------------------------------------|-----------------------------|------------------------|
| Shangdianzi  | SDZ          | 117.12            | 40.65            | 293                | 80/10                  | May 2010 to August 2012;<br>December 2015-<br>September 2010- | In-situ/2h<br>Weekly flasks | North China Plain      |
| Mt. Waliguan | WLG          | 100.90            | 36.29            | 3816               | 80                     | October 2010-                                                 | Weekly flasks               | Qinghai-Tibet Plateau  |
| Lin'an       | LAN          | 119.73            | 30.30            | 138                | 50                     | September 2010-                                               | Weekly/Daily flasks         | Yangtze River Delta    |
| Longfengshan | LFS          | 127.60            | 44.73            | 330                | 80                     | September 2010-                                               | Weekly flasks               | Northeast China Plain  |
| Shangri-La   | XGL          | 99.44             | 28.01            | 3580               | 50                     | July 2011-                                                    | Weekly flasks               | Yunnan-Guizhou Plateau |
| Jiangjin     | JGJ          | 106.15            | 29.15            | 262                | 10                     | March 2017-                                                   | Daily flasks                | Sichuan Basin          |
| Akedala      | AKD          | 87.97             | 47.10            | 562                | 50                     | August 2017-                                                  | Weekly flasks               | Northwest China        |
| Jinsha       | JSA          | 114.21            | 29.64            | 750                | 50                     | December 2018-                                                | Weekly flasks               | Central China          |
| Xinfeng      | XFG          | 114.17            | 24.08            | 870                | 50                     | August 2018-                                                  | Weekly flasks               | Pearl River Delta      |

**Table 1 Monitoring stations in China used in this study.** ‘magl’ is meters above ground level, ‘masl’ is meters above sea level. Shangdianzi changed the sampling height from 10 m to 80 m at 19<sup>th</sup>, August, 2011. There was a three-year gap in SDZ in-situ measurement due to system malfunction. LAN started to collect daily flask samples from January 2019.

| Year | Emissions in China<br>(Gg yr <sup>-1</sup> ) | Emissions in the whole domain<br>(Gg yr <sup>-1</sup> ) |
|------|----------------------------------------------|---------------------------------------------------------|
| 2011 | 241                                          | 688                                                     |
| 2012 | 242                                          | 766                                                     |
| 2013 | 263                                          | 895                                                     |
| 2014 | 285                                          | 967                                                     |
| 2015 | 302                                          | 921                                                     |
| 2016 | 317                                          | 949                                                     |
| 2017 | 338                                          | 1045                                                    |
| 2018 | 357                                          | 1045                                                    |
| 2019 | 379                                          | 1045                                                    |

**Table 2 Initial values for a priori emissions in China and whole domain.** The emissions in China were obtained from previous bottom-up inventory of CH<sub>2</sub>Cl<sub>2</sub> emissions in China<sup>1</sup>. The total a priori emissions in the computational domain were taken from a previous estimate of emissions in Asia<sup>2</sup>. The emissions in the whole domain in 2018 and 2019 were assumed to be the same as 2017. The initial estimates of total a priori emissions for remainder of the domain were calculated as emissions in the whole domain minus emissions in China.

|      | Total CH <sub>2</sub> Cl <sub>2</sub> (Gg) |                                             | Feedstock use (Gg) |                                             | Pharmaceutical industry (Gg)                | Emissive solvent (Gg)                       | Coal (Tg)       |                  | Steel and iron industry (Tg) |                     |                        |
|------|--------------------------------------------|---------------------------------------------|--------------------|---------------------------------------------|---------------------------------------------|---------------------------------------------|-----------------|------------------|------------------------------|---------------------|------------------------|
|      | CH <sub>2</sub> Cl <sub>2</sub> production | CH <sub>2</sub> Cl <sub>2</sub> consumption | HFC-32 production  | CH <sub>2</sub> Cl <sub>2</sub> consumption | CH <sub>2</sub> Cl <sub>2</sub> consumption | CH <sub>2</sub> Cl <sub>2</sub> consumption | Coal production | Coal consumption | Sintering production         | Pig iron production | Crude steel production |
| 2013 | 830                                        | 794.5                                       | 53                 | 90.2                                        | 222.5                                       | 481.8                                       | 3974            | 4244             | 887                          | 711                 | 813                    |
| 2014 | 880                                        | 844.9                                       | 52                 | 88.9                                        | 236.6                                       | 519.5                                       | 3874            | 4136             | 901                          | 714                 | 822                    |
| 2015 | 1110                                       | 983.2                                       | 84                 | 144.4                                       | 275.3                                       | 563.5                                       | 3747            | 3998             | 870                          | 691                 | 804                    |
| 2016 | 1170                                       | 1046.6                                      | 88                 | 151.1                                       | 293                                         | 602.5                                       | 3411            | 3888             | 813                          | 702                 | 808                    |
| 2017 | 1270                                       | 1124.9                                      | 151                | 259                                         | 315                                         | 550.9                                       | 3524            | 3914             | 839                          | 714                 | 871                    |
| 2018 | 1420                                       | 1271.6                                      | 175                | 300.1                                       | 356                                         | 615.5                                       | 3698            | 3975             | 832                          | 780                 | 929                    |
| 2019 | 1300                                       | 1113.7                                      | 186                | 319                                         | 311.8                                       | 482.9                                       | 3846            | 4019             | 867                          | 808                 | 995                    |

**Table 3 Activity levels and other relevant values to derive the production/consumption data for CH<sub>2</sub>Cl<sub>2</sub> in each sector used in the bottom-up inventory.** The overall CH<sub>2</sub>Cl<sub>2</sub> production and consumption data were obtained from China Chlor-Alkali Industry Association (CCAIA)<sup>3</sup>, while the consumption data is production plus import minus export. The consumption of CH<sub>2</sub>Cl<sub>2</sub> used as feedstock for HFC-32 production was calculated from annual HFC-32 production (ChinaIOL<sup>4</sup>, <http://data.chinaiol.com>), with a production efficiency of 95 % (following consultation with industry experts; this value is similar to that used in Feng et al.<sup>1</sup>). The consumption of CH<sub>2</sub>Cl<sub>2</sub> used in the pharmaceutical industry is estimated to be 28 % of the overall consumption in each year<sup>3</sup>. All the remaining CH<sub>2</sub>Cl<sub>2</sub> consumption was assumed to be emissive solvent consumption, i.e. the overall consumption minus the consumption in feedstock use and the pharmaceutical industry. The coal production and coal consumption were adapted from the China energy statistical yearbook<sup>5</sup>. The production values in steel and iron industry were obtained from the China steel yearbook<sup>6</sup>. The most up-to-date values were used in both cases.

|                 | CH <sub>2</sub> Cl <sub>2</sub> | CH <sub>2</sub> Cl <sub>2</sub> | CH <sub>2</sub> Cl <sub>2</sub> release from | CH <sub>2</sub> Cl <sub>2</sub> release | CH <sub>2</sub> Cl <sub>2</sub> release in coal |                        | CH <sub>2</sub> Cl <sub>2</sub> release in steel and iron industry |                              |                              |
|-----------------|---------------------------------|---------------------------------|----------------------------------------------|-----------------------------------------|-------------------------------------------------|------------------------|--------------------------------------------------------------------|------------------------------|------------------------------|
|                 | production                      | feedstock use                   | pharmaceutical                               | as emissive                             | production and consumption                      |                        |                                                                    |                              |                              |
|                 | leakage                         | leakage                         | industry                                     | solvent                                 | production                                      | consumption            | sintering                                                          | ironmaking                   | steelmaking                  |
| Emission factor | 0.005                           | 0.005                           | 0.05-0.12                                    | 1 (0.5+0.5)                             | 10 <sup>-9</sup>                                | 1.4 × 10 <sup>-7</sup> | (0.47-2.11) × 10 <sup>-7</sup>                                     | (1.2-8.4) × 10 <sup>-9</sup> | (4.8-7.2) × 10 <sup>-9</sup> |

**Table 4 Emission factors for CH<sub>2</sub>Cl<sub>2</sub> in each sector used in the bottom-up inventory.** The leakage of CH<sub>2</sub>Cl<sub>2</sub> in production process or feedstock use for HFC-32 adopt the default fugitive emission factors during chemical production from IPCC (2000)<sup>7</sup>. There exist solvent recovery and waste treatment processes in the pharmaceutical industry, and the emission factor in this sector is estimated using mass balance and the rate of solvent waste treatment, which we assume to be 88-95%<sup>8</sup>. We assume the emission factor for emissive solvents is 50% in the first year and 50% in the second year. The emission factors for coal production and coal consumption were obtained from Feng et al.<sup>1</sup>. The emission factors in the steel and iron industry were adapted from Ding et al.<sup>9</sup>.

| Year | Emissions from China (Gg yr <sup>-1</sup> ) |                  |                  | Emissions from China (Gg yr <sup>-1</sup> ) |                  |                  | Global emissions (Gg yr <sup>-1</sup> ) |                  |                  |
|------|---------------------------------------------|------------------|------------------|---------------------------------------------|------------------|------------------|-----------------------------------------|------------------|------------------|
|      | Top-down                                    |                  |                  | Bottom-up                                   |                  |                  | Top-down                                |                  |                  |
|      | Mean                                        | 16 <sup>th</sup> | 84 <sup>th</sup> | Mean                                        | 16 <sup>th</sup> | 84 <sup>th</sup> | Mean                                    | 16 <sup>th</sup> | 84 <sup>th</sup> |
| 2011 | 231                                         | 213              | 245              |                                             |                  |                  | 683                                     | 541              | 825              |
| 2012 | 272                                         | 247              | 291              |                                             |                  |                  | 779                                     | 628              | 930              |
| 2013 | 456                                         | 412              | 500              | 506                                         | 483              | 531              | 884                                     | 705              | 1059             |
| 2014 | 452                                         | 414              | 483              | 526                                         | 508              | 545              | 910                                     | 724              | 1098             |
| 2015 | 534                                         | 477              | 574              | 572                                         | 552              | 592              | 881                                     | 697              | 1068             |
| 2016 | 466                                         | 429              | 497              | 615                                         | 593              | 636              | 933                                     | 745              | 1124             |
| 2017 | 557                                         | 522              | 590              | 612                                         | 590              | 632              | 1021                                    | 813              | 1227             |
| 2018 | 511                                         | 483              | 536              | 623                                         | 601              | 645              | 1019                                    | 810              | 1228             |
| 2019 | 628                                         | 599              | 658              | 585                                         | 564              | 604              | 1038                                    | 826              | 1251             |

**Table 5 Results for global emissions and emissions from China.** The “top-down” and “bottom-up” are the inversion and inventory-based estimations, respectively. The 16<sup>th</sup> and 84<sup>th</sup> are the corresponding percentile derived from the distribution of the emissions, which represents the 1 s.d. uncertainties for a Normal distribution.

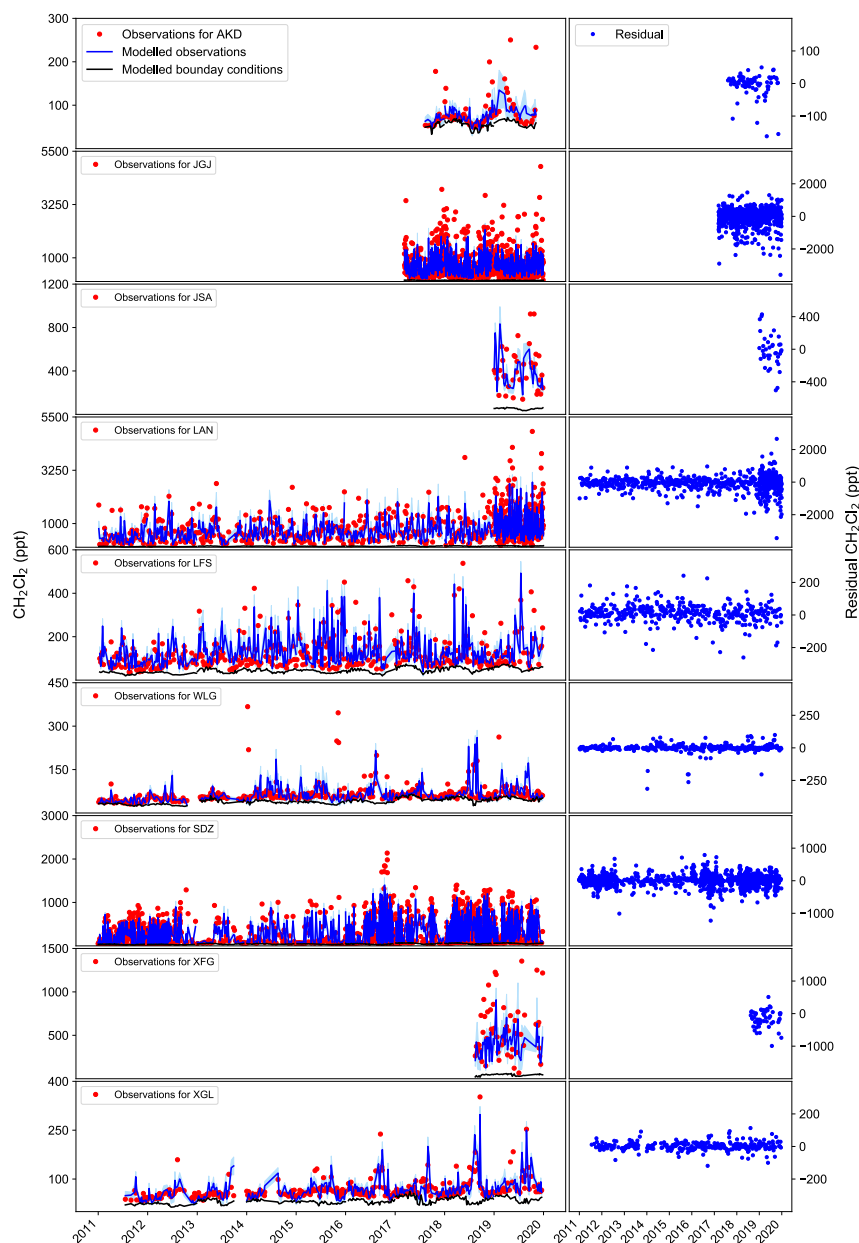

**Fig. 1 Observed and simulated  $\text{CH}_2\text{Cl}_2$  mole fractions.** On the left panel, the modelled mole fractions (blue line) and their uncertainties (blue shading) derived from the inferred a posteriori emission, are compared to observation data (red dots) at each site. Modelled a posteriori mean baseline time series are also shown (black line). Observation data from the sites may indicate the magnitude of regional emission sources around each site. For some sites, such as Akedala (AKD), Shangri-la (XGL) and Waliguan (WLG), values are comparatively lower, with most measurements quite close to baseline values and pollution events up to only few hundred ppt, suggesting that there are fewer significant local sources, or that existing sources are intermittent and therefore not captured by the flasks sampling strategy, from regions to which measurements at these sites are sensitive (see Supplement Fig 6). In contrast, there are considerable enhancements above baseline for Lin'an (LAN), Jiangjin (JGJ) and Shangdianzi (SDZ), located in Yangtze River Delta area, Sichuan Basin and North China plain, respectively, indicating strong local sources in their sensitive regions. The right panel shows the residuals between observations and simulated mole fractions. This plot shows good fit for the simulation to the observations.

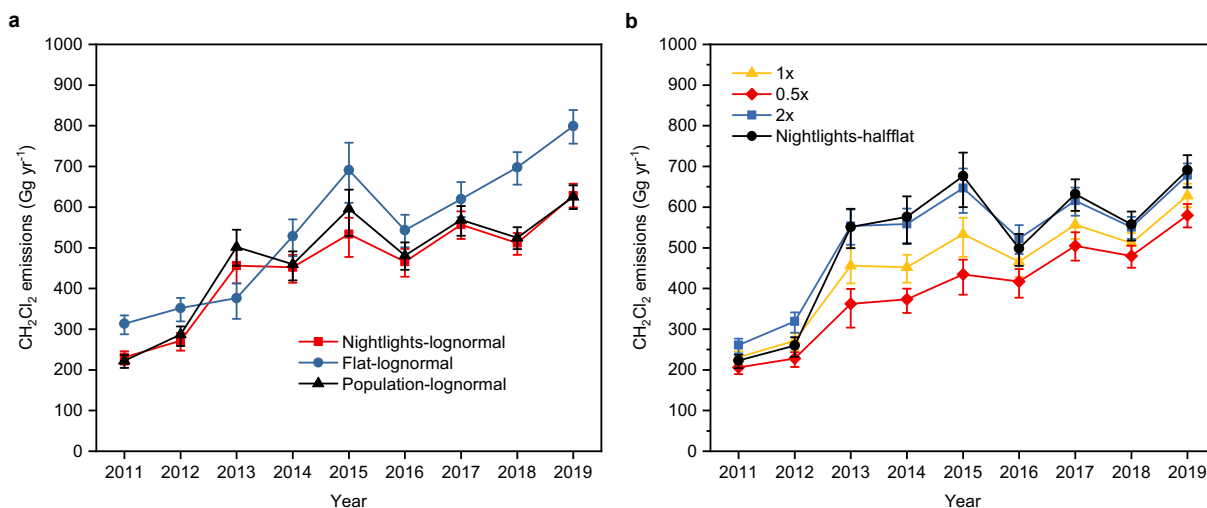

**Fig. 2 Derived emissions from China using different a priori information. (a)** Emissions inferred using different a priori spatial distributions. All results show similar temporal variations. The population and nightlights-based priors exhibit very similar results. The flat prior, with emissions distributed uniformly across China and outside China, has slightly higher results in later years, which may be due to the fact that our measurements have relatively poor sensitivity to some regions in China, especially Tibet in the southwest of China. A uniform prior distribution will give this area an initial value which, due to low sensitivity, may not be modified during the inversion. However, as far as we know, CH<sub>2</sub>Cl<sub>2</sub> originates predominantly from anthropogenic sources, so we do not expect any significant emission sources from Tibet. **(b)** Emissions inferred using different initial values for a priori emissions. The uncertainty range for results of ‘0.5-2 time the a priori’ agree well with each other, though there are large uncertainties in 2013-2015, when no in-situ measurement was conducted during this period. The black line shown in (b) is the inferred results using an uninformative a priori distribution for emissions (termed half-flat), which does not use any a priori magnitude information but forces the value to be positive. This line also shows a similar trend to the one used in the study. All the uncertainties in this plot are the 68% interval.



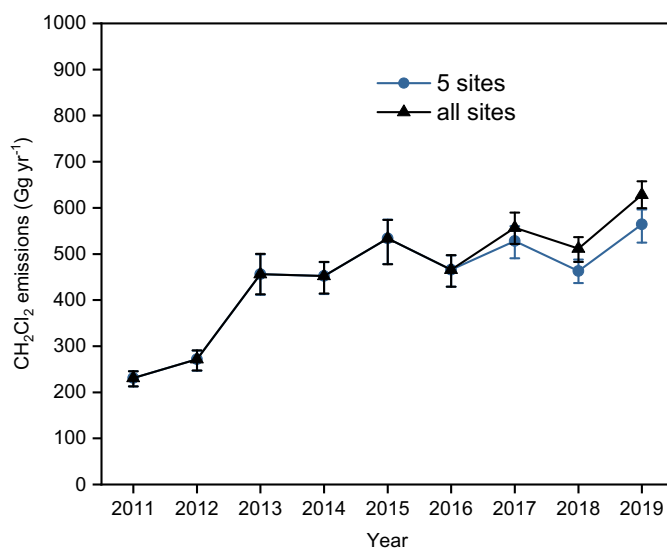

**Fig. 3 Derived emissions from China using different measurement datasets.** In addition to the results shown in the main text, where observations from all available measurement sites were used in the inversion (black line in this plot), inversions with observations from only 5 sites where observation persists throughout the study period (i.e. LAN, LFS, WLG, SDZ, XGL) were also conducted (blue line in this plot). Both the uncertainties are the 68% interval. The two results show similar trend.

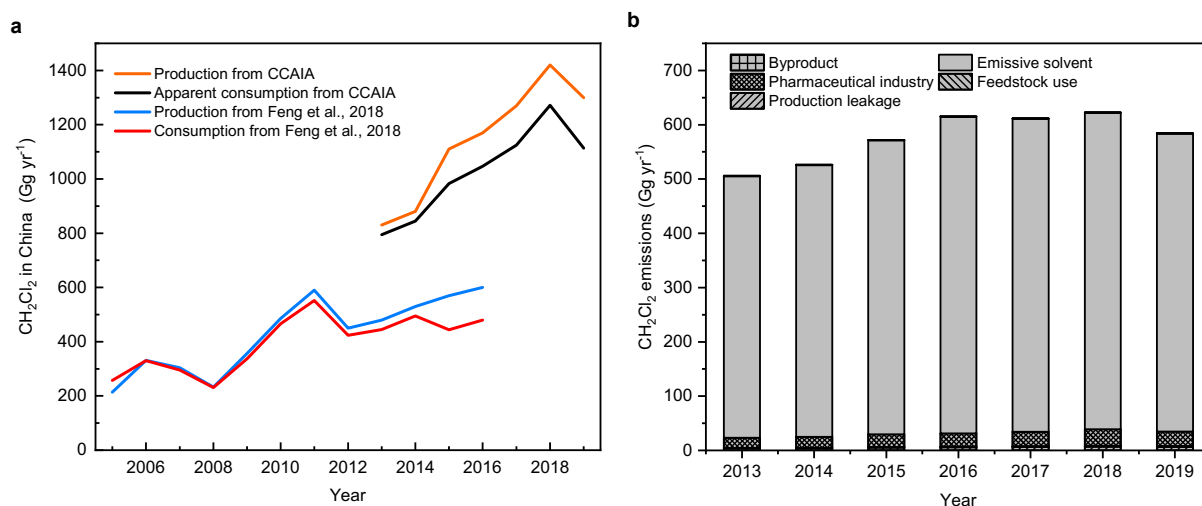

**Fig. 4 Information for the bottom-up estimation. (a)** Production and consumption data. Consumption (red line) and production (blue line) data used in the previously published bottom-up research for 2005-2016<sup>1</sup>, and a new set of consumption (black line) and production (orange line) data acquired from China Chlor-Alkali Industry Association (CCAIA)<sup>3</sup> for 2013-2019 used in the new bottom-up estimation in this study. The consumption data from CCAIA were calculated by production + import – export and referred to as apparent consumption. **(b)** The bottom-up emission results from different sectors estimated in this study. The emissive solvent sector (including use as blowing agent for polyurethane foam manufacture) accounts for more than 90% of emissions.

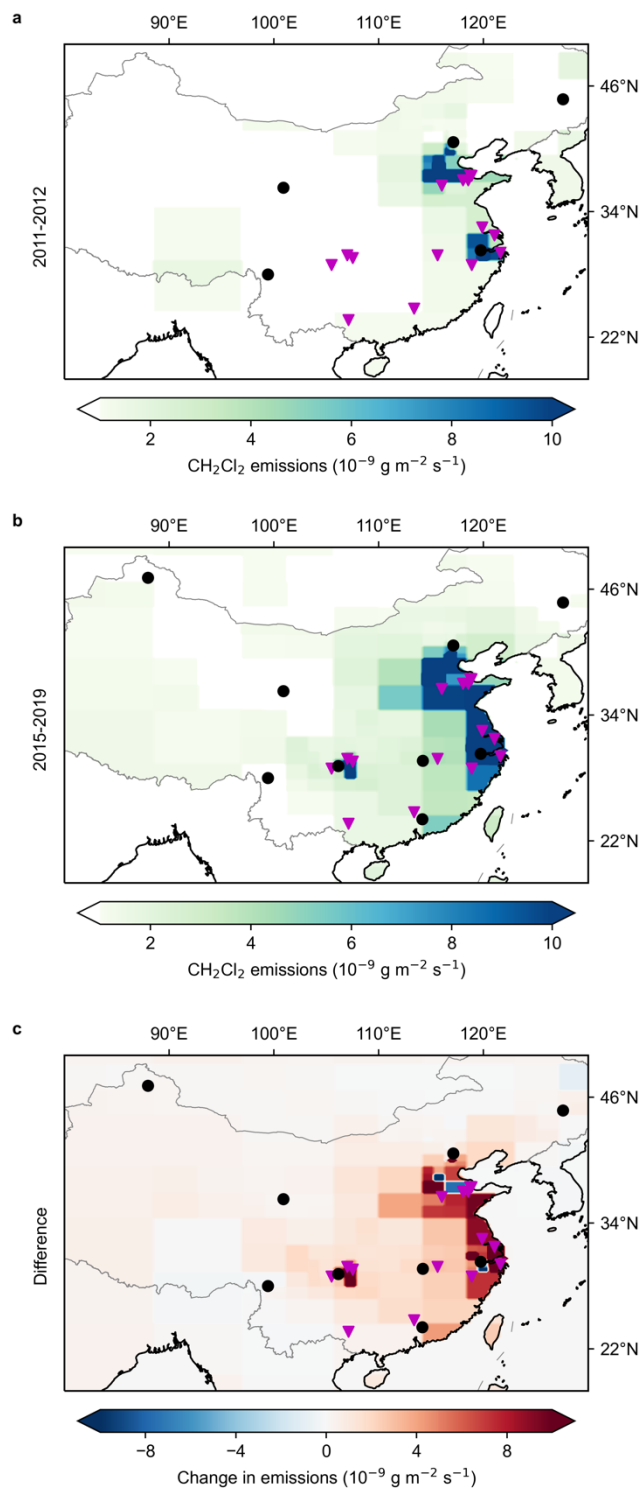

**Fig. 5** Spatial distribution of  $\text{CH}_2\text{Cl}_2$  emissions in Eastern Asia with focus on China. As seen in Fig. 3 of the main text, but using a uniform (flat) prior distribution. (a) The average mean emissions of  $\text{CH}_2\text{Cl}_2$  in 2011-2012. (b) The average mean emissions of  $\text{CH}_2\text{Cl}_2$  in 2015-2019. (c) The difference between (a) and (b). The black dots in the figures represent the measurement sites active in that period and the pink triangles are the known chloromethane factories in China.

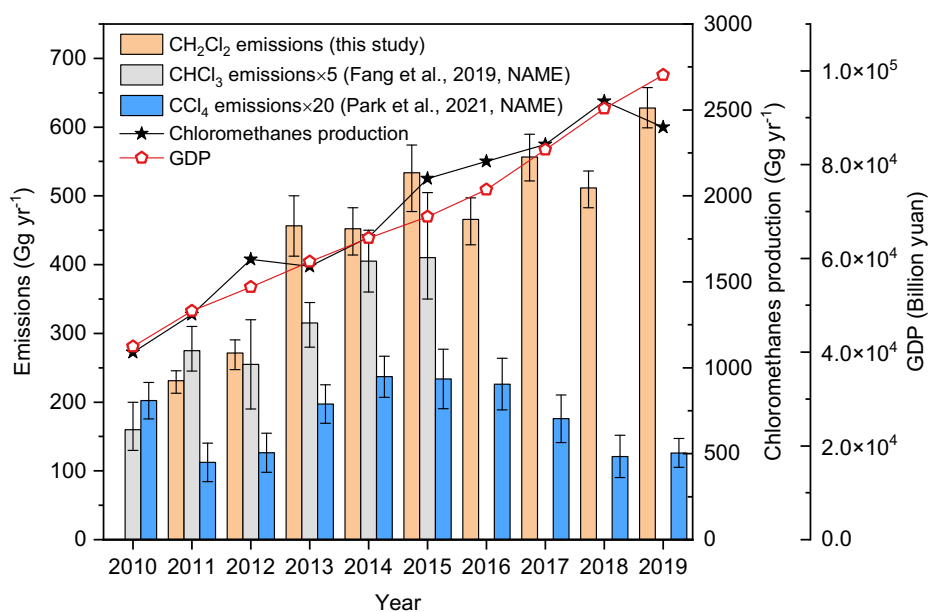

**Fig. 6 Emissions of CH<sub>2</sub>Cl<sub>2</sub>, CHCl<sub>3</sub><sup>10</sup> and CCl<sub>4</sub><sup>11</sup> in China.** From previous papers, if emissions were estimated with multiple methods, the results using NAME are adopted for comparison. Emissions of CHCl<sub>3</sub> and CCl<sub>4</sub> are for eastern China only. Emissions of CHCl<sub>3</sub> have been multiplied by five, and CCl<sub>4</sub> emissions by twenty, for ease of comparison. Total chloromethanes production (combination of CH<sub>2</sub>Cl<sub>2</sub> and CHCl<sub>3</sub>) in China is also shown. The GDP represents for Gross Domestic Product of China, obtained from the yearbook<sup>12</sup>.

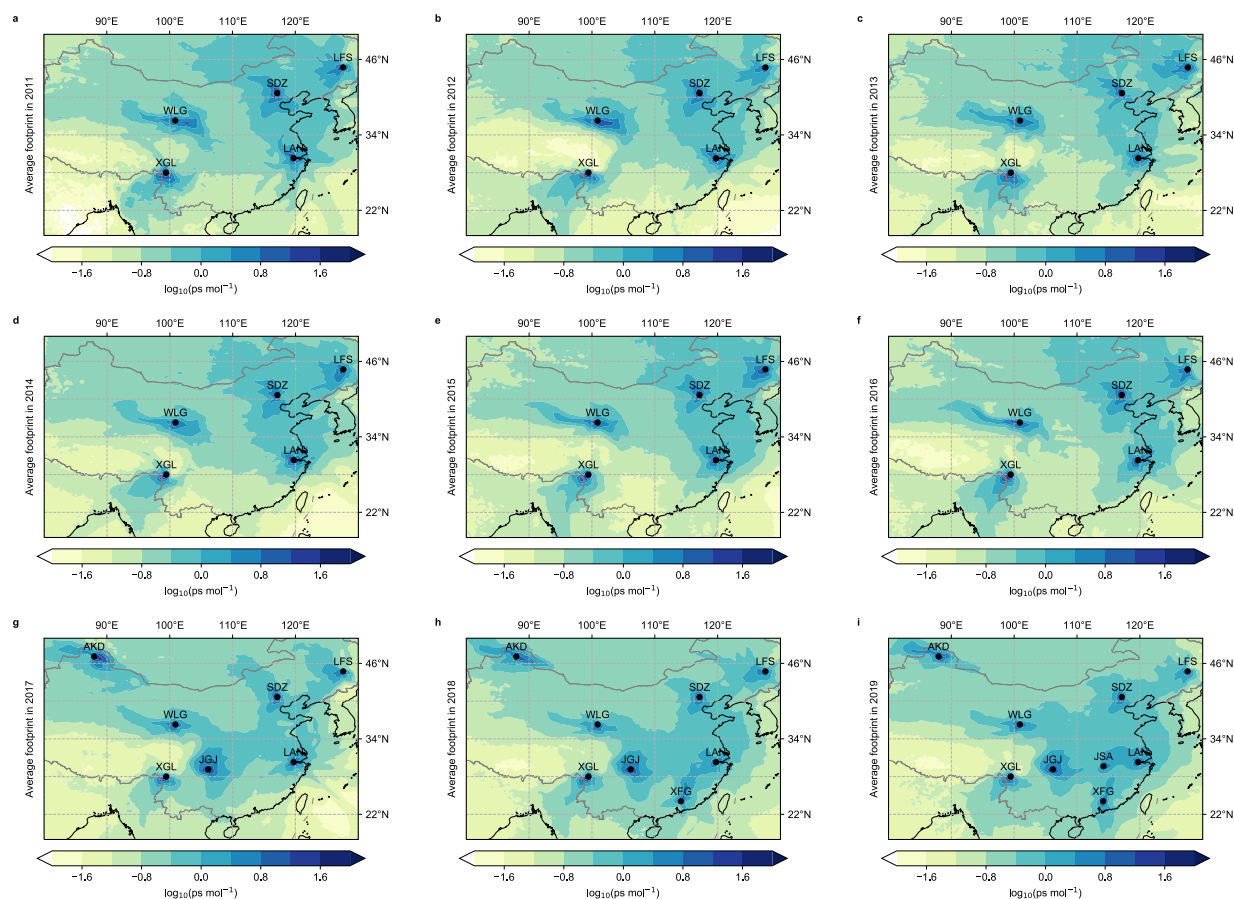

**Fig. 7** Average sensitivity of the observations to emissions of  $\text{CH}_2\text{Cl}_2$  in each year. Each plot shows the mean result of averaged footprints from all sites in that year when measurements were conducted at that site. For most of the regions, including the eastern part of China where substantial emissions are thought to occur, the mean sensitivity did not change substantially throughout the period.

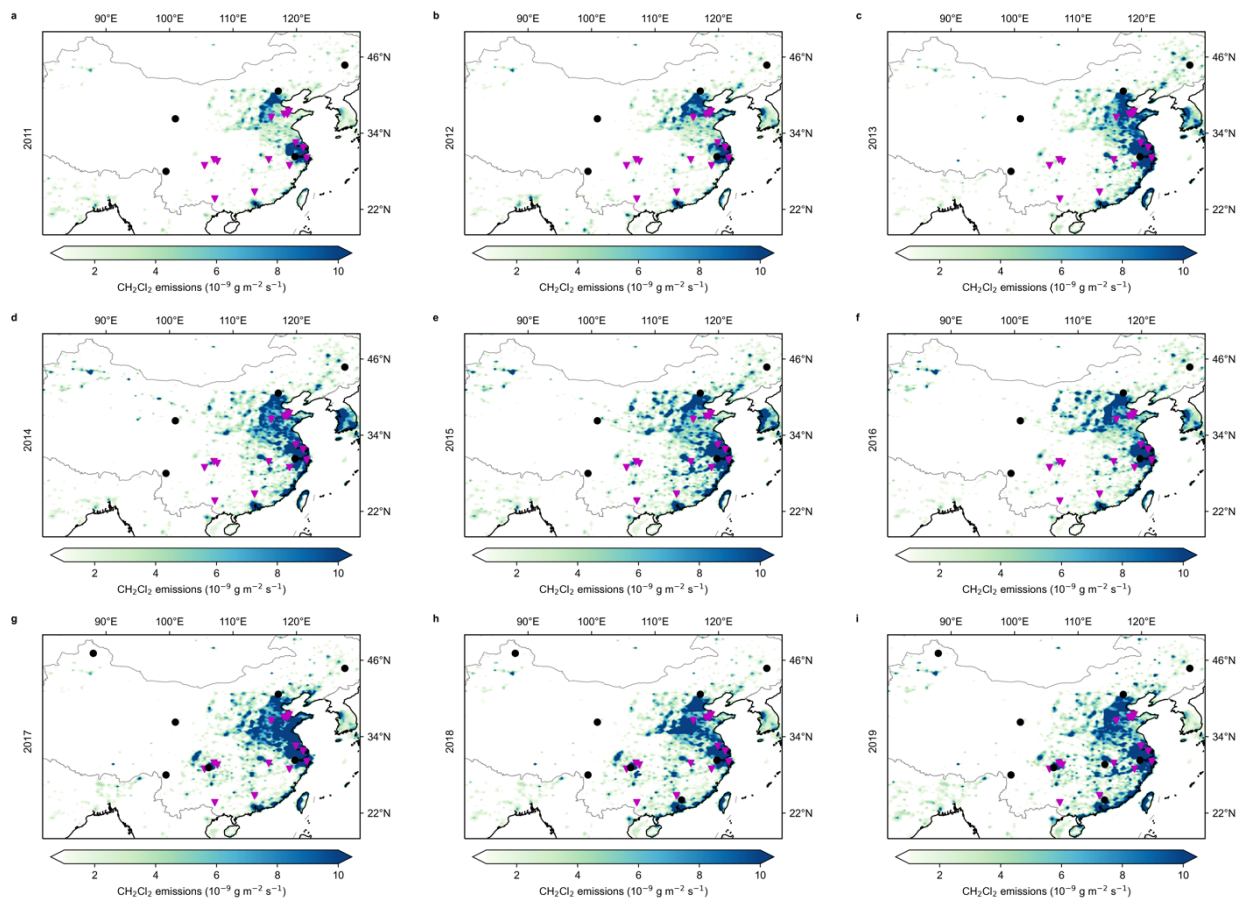

**Fig. 8** Spatial distribution of  $\text{CH}_2\text{Cl}_2$  emissions in Eastern Asia with focus on China during 2011-2019. The black dots in the figures represent the measurement sites active in that year; the pink triangles are the known chloromethanes factories in China.

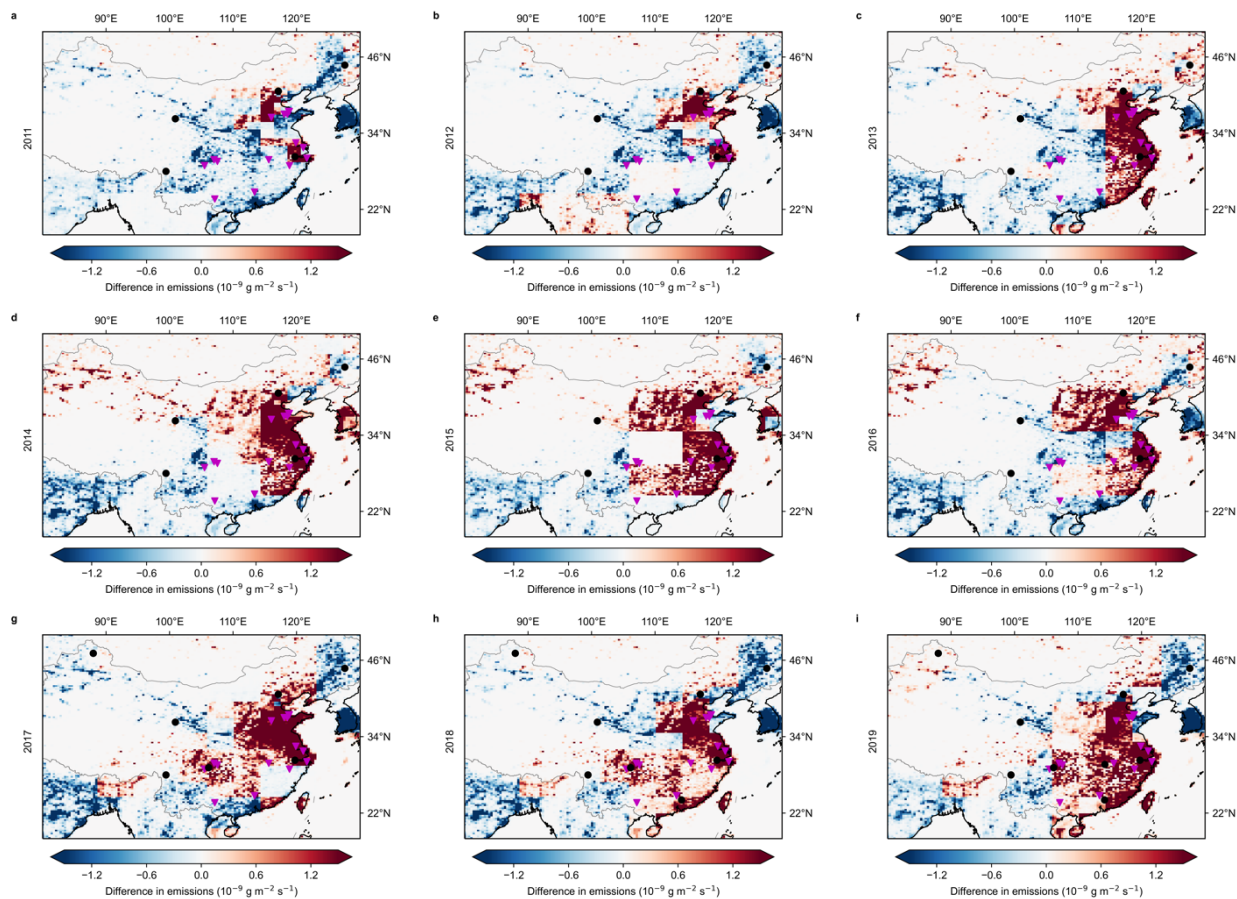

**Fig. 9 Spatial distribution of the difference between the final results and the a priori emissions for  $\text{CH}_2\text{Cl}_2$  during 2011-2019.** These plots show the difference between the a posteriori mean emission distribution after the inversion and the a priori emission distribution. The black dots in the figures represent the measurement sites active in that year. The pink triangles are the known chloromethanes factories in China. We can see that before the rapid increase (before 2013), only part of Yangtze River Delta and North China plain have greater emissions, relative to the a priori emissions, while after 2013 a wider area of the Yangtze River Delta and North China plain are significantly larger than the a priori emissions.

## References

1. Feng, Y., Bie, P., Wang, Z., Wang, L. & Zhang, J. Bottom-up anthropogenic dichloromethane emission estimates from China for the period 2005–2016 and predictions of future emissions. *Atmos. Environ.* **186**, 241–247 (2018).
2. Claxton, T. *et al.* A synthesis inversion to constrain global emissions of two very short lived chlorocarbons: dichloromethane, and perchloroethylene. *J. Geophys. Res. Atmos.* **125**, e2019JD031818 (2020).
3. China Chlor-Alkali Industry Association (CCAIA). Report on chloromethanes industry in China (in Chinese). <http://www.ccaon.com/jwlhw.asp> (2021).
4. ChinaIOL. China's HFC-32 production (in Chinese). <http://data.chinaiol.com> (2021).
5. Department of Energy Statistics, National Bureau of Statistics. *China Energy Statistical Yearbook (in Chinese)*. (China Statistics Press, Beijing, China, 2020).
6. China Iron and Steel Industry Association. *China Steel Yearbook (in Chinese)*. (The editorial board of China steel yearbook, Beijing, China, 2018-2020).
7. Intergovernmental Panel on Climate Change (IPCC). *Good Practice Guidance and Uncertainty Management in National Greenhouse Gas Inventories*. (2000).
8. Song, Y. Study on emission standard of volatile organic compounds and malodorous gases from penicillin industry (in Chinese). (Hebei University of Science and Technology, 2014).
9. Ding, X. *et al.* Gaseous and particulate chlorine emissions from typical iron and steel industry in China. *J. Geophys. Res. Atmos.* **125**, e2020JD032729 (2020).
10. Fang, X. *et al.* Rapid increase in ozone-depleting chloroform emissions from China. *Nat. Geosci.* **12**, 89–93 (2019).
11. Park, S. *et al.* A decline in emissions of CFC-11 and related chemicals from eastern China. *Nature* **590**, 433–437 (2021).
12. National Bureau of Statistics of China. *China Statistical Yearbook*. (China Statistics Press, Beijing, China, 2020).
